# Supplementary material for: Long-term river trajectories to enhance restoration efficiency and sustainability on the Upper Rhine: an interdisciplinary study (Rohrschollen Island, France)
Source: Copernicus journal article supplement (doi:10.5194/hess-2017-435), 2017-08-28
Supplement: Supplementary file 1 [file hess-2017-435-supplement.pdf]

## Supplementary information

---

### **Long-term river trajectories to enhance restoration efficiency and sustainability on the Upper Rhine: an interdisciplinary study (Rohrschollen Island, France)**

David Eschbach <sup>1</sup>, Laurent Schmitt <sup>1</sup>, Gwenaël Imfeld <sup>2</sup>, Jan-Hendrik May <sup>3,4</sup>, Sylvain Payraudeau <sup>2</sup>, Frank Preusser <sup>3</sup>, Mareike Trauerstein <sup>5</sup>, Grzegorz Skupinski <sup>1</sup>

<sup>1</sup>Laboratoire Image, Ville, Environnement (LIVE UMR 7362), Université de Strasbourg, CNRS, ENGEES, ZAEU LTER, Strasbourg, France

<sup>2</sup>Laboratoire d'Hydrologie et de Géochimie de Strasbourg (LHyGeS UMR 7517), Université de Strasbourg, CNRS, ENGEES, Strasbourg, France

<sup>3</sup>Institute of Earth and Environmental Sciences, University of Freiburg, Freiburg, Germany

<sup>4</sup>School of Geography, University of Melbourne, Australia

<sup>5</sup>Institute of Geography, University of Bern, Bern, Switzerland

*Correspondence to:* David Eschbach ([david.eschbach@live-cnrs.unistra.fr](mailto:david.eschbach@live-cnrs.unistra.fr))

*Table S1. Physico-chemical characteristics of 38 legacy and modern organic chemical pollutants (including 30 pesticides, the hexachlorobenzene and 7 polychlorinated biphenyls)*

| Name                      | Famille                | Type                               | <sup>a</sup> Solubility (mg.L <sup>-1</sup> ) | <sup>a</sup> K <sub>oc</sub>   | <sup>a</sup> DT50 |
|---------------------------|------------------------|------------------------------------|-----------------------------------------------|--------------------------------|-------------------|
|                           |                        |                                    | In water at 20°C (mg.L <sup>-1</sup> )        | [L.kg <sup>-1</sup> of carbon] | [Days]            |
| (2-Hydroxy)-terbutylazine | Triazine               | Herbicide, microbiocide, Algicide  | 6.6                                           | 230.7944162                    | 75.1              |
| (Beta)-endosulfan         | organochlorine         | Insecticide                        | 0.32                                          | 11500                          | 50                |
| 2, 4 DDT                  | Organochlorine         | Insecticide                        | 0.006                                         | 151000                         | 6200              |
| 4, 4 DDT                  | Organochlorine         | Insecticide                        | 0.006                                         | 151000                         | 6200              |
| Atrazine                  | Triazine               | Herbicide                          | 35                                            | 100                            | 75                |
| Atrazine-Desethyl         | Transformation product | Transformation product             | -                                             | 24b                            | 238b              |
| Azinphos-ethyl            | Organophosphate        | Insecticide/acaricide              | 4.5                                           | 1500                           | 50                |
| Carbendazime              | Benzimidazole          | Fungicide                          | 8                                             | 264                            | 40                |
| Carbofuran                | Carbamate              | Insecticide, Nematicide, Acaricide | 322                                           | 276                            | 29                |
| Chloropyrifos-methyle     | Organophosphate        | Insecticide/acaricide              | 2.74                                          | 4645                           | 3                 |
| Chlorothalonil            | chloronitrile          | fongicide                          | 0.81                                          | 850                            | 22                |
| Chlorpyrifos-ethyl        | Organophosphate        | Insecticide                        | 1.05                                          | 8151                           | 50                |
| Cyproconazole             | Triazole               | Fungicide                          | 93                                            | 363                            | 142               |
| Deltamethrine             | Pyrethroid             | Insecticide                        | 0.0002                                        | 10240000                       | 13                |
| Diazinon                  | organophosphate        | Insecticide, Acaricide, Repellent  | 60                                            | 27.1                           | 9.1               |
| Diuron                    | Phenylurée             | Herbicide                          | 35.6                                          | 813                            | 75.5              |
| Endosulfan (alpha)        | organochlorine         | Insecticide                        | 0.32                                          | 11500                          | 50                |
| Endosulfan (sulfate)      | organochlorine         | Insecticide                        | 0.32                                          | 11500                          | 50                |
| Ethyl parathion           | Organophosphate        | Insecticide/acaricide              | 12.4                                          | 7660                           | 49                |
| Fenitrothion              | Organophosphate        | Insecticide                        | 19                                            | 2000                           | 2.7               |
| HCH, Alpha                | Organochlorine         | Insecticide                        | 8.52                                          | 1270                           | 980               |
| HCH, Béta                 | Organochlorine         | Insecticide                        | 8.52                                          | 1270                           | 980               |
| HCH, Delta                | Organochlorine         | Insecticide                        | 8.52                                          | 1270                           | 980               |
| HCH, gamma                | Organochlorine         | Insecticide                        | 8.52                                          | 1270                           | 980               |

| Name             | Famille                   | Type                          | <sup>a</sup> Solubility (mg.L <sup>-1</sup> ) | <sup>a</sup> K <sub>oc</sub>   | <sup>a</sup> DT50  |
|------------------|---------------------------|-------------------------------|-----------------------------------------------|--------------------------------|--------------------|
|                  |                           |                               | In water at 20°C (mg.L <sup>-1</sup> )        | [L.kg <sup>-1</sup> of carbon] | [Days]             |
| Isoxaflutole     | Oxyacetamide              | Herbicide                     | 6.2                                           | 145                            | 2                  |
| Metazachlore     | Chloroacetamide           | Herbicide                     | 450                                           | 54                             | 8.6                |
| Methyl Parathion | Organophosphate           | Insecticide                   | 55                                            | 240                            | 12                 |
| Ofurace          | Phenylamide               | Fungicide                     | 146                                           | 38                             | 26                 |
| Simazine         | Triazine                  | herbicide                     | 5                                             | 130                            | 60                 |
| Tetraconazole    | Triazole                  | Fungicide                     | 156.6                                         | 969                            | 61                 |
| HCB              | Hexachlorobenzene         | Fungicide                     | 0.004 <sup>c</sup>                            | 4168693 <sup>c</sup>           | 985 <sup>c</sup>   |
| PCB 101          |                           |                               |                                               | 389045 <sup>d</sup>            | 3650 <sup>d</sup>  |
| PCB 118          |                           |                               |                                               | 288403 <sup>d</sup>            | 2500 <sup>d</sup>  |
| PCB 138          |                           |                               |                                               | 323593 <sup>d</sup>            | 6875 <sup>d</sup>  |
| PCB 153          | Polychlorinated biphenyls | Dielectric and coolant fluids | -                                             | 354813 <sup>d</sup>            | 6875 <sup>d</sup>  |
| PCB 180          |                           |                               |                                               | 263026 <sup>d</sup>            | 13750 <sup>d</sup> |
| PCB 28           |                           |                               |                                               | 177827 <sup>d</sup>            | 1083 <sup>d</sup>  |
| PCB 52           |                           |                               |                                               | 208929 <sup>d</sup>            | 3650 <sup>d</sup>  |

<sup>a</sup>LEWIS et al., 2016.

<sup>b</sup>Toxnet, <https://www.nlm.nih.gov/pubs/factsheets/toxnetfs.html>

<sup>c</sup>EU, [http://ec.europa.eu/environment/archives/docum/pdf/bkh\\_annex\\_14.pdf](http://ec.europa.eu/environment/archives/docum/pdf/bkh_annex_14.pdf)

<sup>d</sup>Sinkkonen and Paasivirta, 2000.

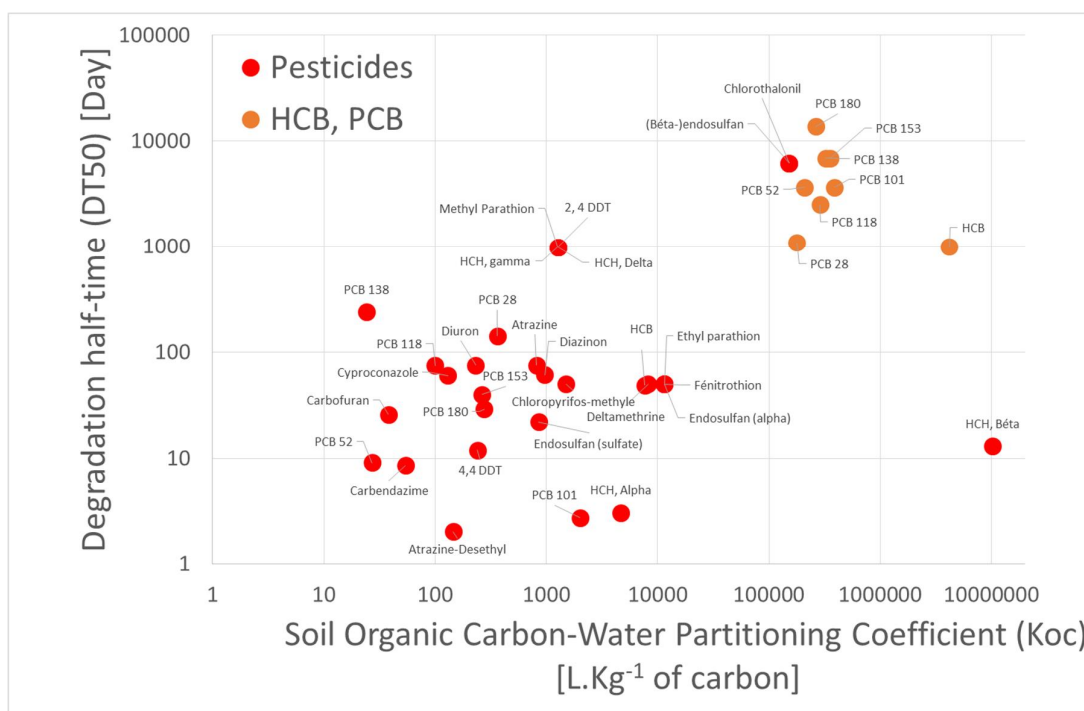

**Figure S1:** Half-life time (DT50) of 38 legacy and modern organic chemical pollutants (including 30 pesticides, the hexachlorobenzene and 7 polychlorinated biphenyls) as a function of soil organic carbon-water partitioning coefficient (Koc)

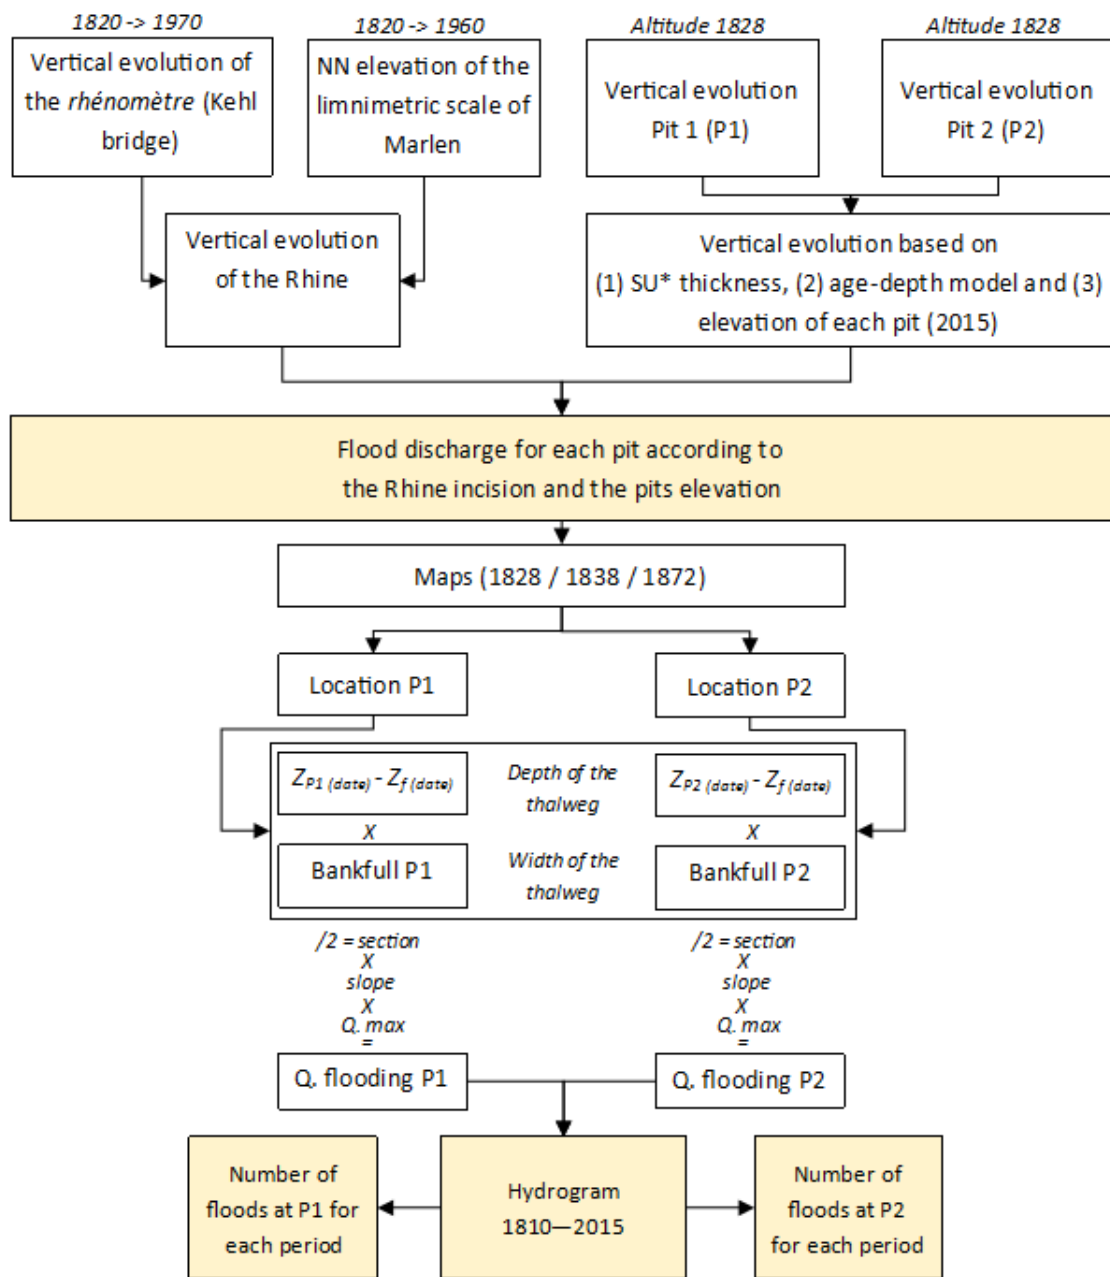

\* Stratigraphical units

Figure S2: Treatment chain for the discharge estimation of the floods having affected the two pits.

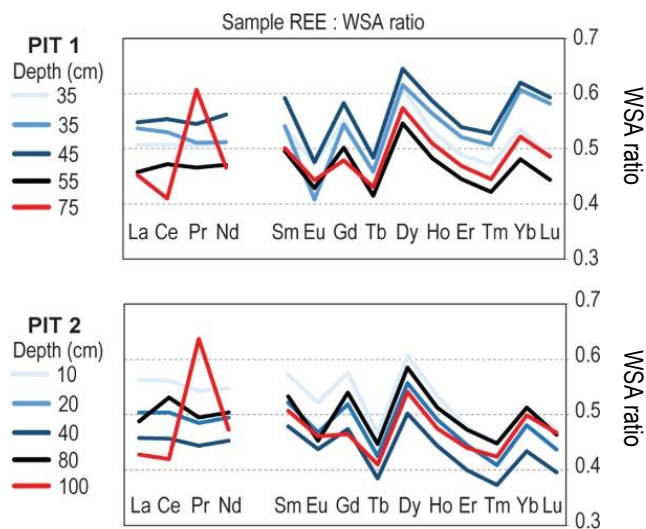

*Figure S3: Change of rare-earth elemental composition with depth (based on the World Shale Average (WSA) standard) for pit 1 and pit 2.*

## Reference

Lewis, K.A., Tzilivakis, J., Warner, D. and Green, A. (2016). An international database for pesticide risk assessments and management. *Human and Ecological Risk Assessment: An International Journal*, 22(4): 1050-1064. DOI: 10.1080/10807039.2015.1133242

Sinkkonen S., Paasivirta J., 2000. Degradation half-life times of PCDDs, PCDFs and PCBs for environmental fate modeling. *Chemosphere*, 40(9611), 9436949.
